# Supplementary material
Source: publisher figshare collection journal article supplement (https://acs.figshare.com/ndownloader/files/4545634)
Supplement: Supplementary file 1 [file 4545634]

 
data_glo4553 
 
_audit_creation_method            SHELXL-97 
_chemical_name_systematic 
; 
 ? 
; 
_chemical_name_common             ? 
_chemical_melting_point           ? 
_chemical_formula_moiety          ? 
_chemical_formula_sum 
 'C26 H41 F3 N2 O5 S' 
_chemical_formula_weight          550.67
_chemical_absolute_configuration  'ad' 
 
loop_ 
 _atom_type_symbol 
 _atom_type_description 
 _atom_type_scat_dispersion_real 
 _atom_type_scat_dispersion_imag 
 _atom_type_scat_source 
 'C'  'C'   0.0181   0.0091 
 'International Tables Vol C Tables 4.2.6.8 and 6.1.1.4' 
 'H'  'H'   0.0000   0.0000 
 'International Tables Vol C Tables 4.2.6.8 and 6.1.1.4' 
 'N'  'N'   0.0311   0.0180 
 'International Tables Vol C Tables 4.2.6.8 and 6.1.1.4' 
 'O'  'O'   0.0492   0.0322 
 'International Tables Vol C Tables 4.2.6.8 and 6.1.1.4' 
 'F'  'F'   0.0727   0.0534 
 'International Tables Vol C Tables 4.2.6.8 and 6.1.1.4' 
 'S'  'S'   0.3331   0.5567 
 'International Tables Vol C Tables 4.2.6.8 and 6.1.1.4' 
 
_symmetry_cell_setting            'orthorhombic' 
_symmetry_space_group_name_H-M    'P212121'
 
loop_ 
 _symmetry_equiv_pos_as_xyz 
 'x, y, z' 
 '-x+1/2, -y, z+1/2' 
 '-x, y+1/2, -z+1/2' 
 'x+1/2, -y+1/2, -z' 
 
_cell_length_a                    10.6231(3) 
_cell_length_b                    14.0223(5) 
_cell_length_c                    19.2344(9) 
_cell_angle_alpha                 90.00 
_cell_angle_beta                  90.00 
_cell_angle_gamma                 90.00 
_cell_volume                      2865.16(19) 
_cell_formula_units_Z             4 
_cell_measurement_temperature     223(2) 
_cell_measurement_reflns_used     3902 
_cell_measurement_theta_min       0.88
_cell_measurement_theta_max       68.25
 
_exptl_crystal_description        'plate' 
_exptl_crystal_colour             'colourless'
_exptl_crystal_size_max           0.30 
_exptl_crystal_size_mid           0.15 
_exptl_crystal_size_min           0.05 
_exptl_crystal_density_meas       ? 
_exptl_crystal_density_diffrn     1.277 
_exptl_crystal_density_method     'not measured' 
_exptl_crystal_F_000              1176 
_exptl_absorpt_coefficient_mu     1.493 
_exptl_absorpt_correction_type    'multi-scan' 
_exptl_absorpt_correction_T_min   0.6629 
_exptl_absorpt_correction_T_max   0.9291 
_exptl_absorpt_process_details    
 'Denzo (Otwinowski, Borek, Majewski & Minor, 2003)'
 
_exptl_special_details 
; 
 ? 
; 
 
_diffrn_ambient_temperature       223(2) 
_diffrn_radiation_wavelength      1.54178 
_diffrn_radiation_type            CuK\a 
_diffrn_radiation_source          'fine-focus sealed tube' 
_diffrn_radiation_monochromator   graphite 
_diffrn_measurement_device_type   'Nonius KappaCCD APEXII' 
_diffrn_measurement_method        '\w and \f scans'
_diffrn_detector_area_resol_mean  ? 
_diffrn_standards_number          ? 
_diffrn_standards_interval_count  ? 
_diffrn_standards_interval_time   ? 
_diffrn_standards_decay_%         ? 
_diffrn_reflns_number             14433 
_diffrn_reflns_av_R_equivalents   0.064 
_diffrn_reflns_av_sigmaI/netI     0.0438 
_diffrn_reflns_limit_h_min        -12 
_diffrn_reflns_limit_h_max        12 
_diffrn_reflns_limit_k_min        -16 
_diffrn_reflns_limit_k_max        16 
_diffrn_reflns_limit_l_min        -22 
_diffrn_reflns_limit_l_max        23 
_diffrn_reflns_theta_min          3.90 
_diffrn_reflns_theta_max          67.82 
_reflns_number_total              4920 
_reflns_number_gt                 3988 
_reflns_threshold_expression      >2sigma(I) 
 
_computing_data_collection        'Collect (Nonius B.V., 1998)' 
_computing_cell_refinement        'Collect (Nonius B.V., 1998)'
_computing_data_reduction         'Denzo-SMN (Otwinowski & Minor, 1997)'
_computing_structure_solution     'SHELXS-97 (Sheldrick, 1990)' 
_computing_structure_refinement   'SHELXL-97 (Sheldrick, 1997)' 
_computing_molecular_graphics     'XP (BrukerAXS, 2000)' 
_computing_publication_material   'SHELXL-97 (Sheldrick, 1997)'
 
_refine_special_details 
; 
 Refinement of F^2^ against ALL reflections.  The weighted R-factor wR and 
 goodness of fit S are based on F^2^, conventional R-factors R are based 
 on F, with F set to Zero for negative F^2^. The threshold expression of 
 F^2^ > 2sigma(F^2^) is used only for calculating R-factors(gt) etc. and is 
 not relevant to the choice of reflections for refinement.  R-factors based 
 on F^2^ are statistically about twice as large as those based on F, and R- 
 factors based on all data will be even larger. 
; 
 
_refine_ls_structure_factor_coef  Fsqd  
_refine_ls_matrix_type            full 
_refine_ls_weighting_scheme       calc  
_refine_ls_weighting_details 
 'calc w=1/[\s^2^(Fo^2^)+(0.0423P)^2^+1.8534P] where P=(Fo^2^+2Fc^2^)/3' 
_atom_sites_solution_primary      direct 
_atom_sites_solution_secondary    difmap 
_atom_sites_solution_hydrogens    geom 
_refine_ls_hydrogen_treatment     'riding' 
_refine_ls_extinction_method      none 
_refine_ls_extinction_coef        ? 
_refine_ls_abs_structure_details 
 'Flack H D (1983), Acta Cryst. A39, 876-881' 
_refine_ls_abs_structure_Flack    0.00(3) 
_refine_ls_number_reflns          4920 
_refine_ls_number_parameters      340 
_refine_ls_number_restraints      0 
_refine_ls_R_factor_all           0.0704 
_refine_ls_R_factor_gt            0.0521 
_refine_ls_wR_factor_ref          0.1246 
_refine_ls_wR_factor_gt           0.1114 
_refine_ls_goodness_of_fit_ref    1.026 
_refine_ls_restrained_S_all       1.026 
_refine_ls_shift/su_max           0.000 
_refine_ls_shift/su_mean          0.000 
 
loop_ 
 _atom_site_label 
 _atom_site_type_symbol 
 _atom_site_fract_x 
 _atom_site_fract_y 
 _atom_site_fract_z 
 _atom_site_U_iso_or_equiv 
 _atom_site_adp_type 
 _atom_site_occupancy 
 _atom_site_symmetry_multiplicity 
 _atom_site_calc_flag 
 _atom_site_refinement_flags 
 _atom_site_disorder_assembly 
 _atom_site_disorder_group 
C1 C 0.0500(3) 0.0108(3) 0.86772(15) 0.0426(8) Uani 1 1 d . . . 
H1 H -0.0173 0.0149 0.8361 0.051 Uiso 1 1 calc R . . 
N1A N 0.0418(2) 0.0063(2) 0.93747(13) 0.0431(7) Uani 1 1 d . . . 
C1A C 0.1607(3) -0.0003(3) 0.96541(17) 0.0525(9) Uani 1 1 d . . . 
O1A O 0.1616(2) -0.0125(2) 1.03477(11) 0.0643(7) Uani 1 1 d . . . 
C2A C 0.0322(3) 0.0052(3) 1.05722(17) 0.0596(10) Uani 1 1 d . . . 
H2A1 H 0.0247 0.0697 1.0762 0.072 Uiso 1 1 calc R . . 
H2A2 H 0.0083 -0.0405 1.0935 0.072 Uiso 1 1 calc R . . 
C3A C -0.0554(3) -0.0063(3) 0.99273(15) 0.0453(8) Uani 1 1 d . . . 
C4A C -0.1183(3) -0.1051(3) 0.98928(17) 0.0481(9) Uani 1 1 d . . . 
H4A H -0.1701 -0.1091 1.0320 0.058 Uiso 1 1 calc R . . 
C5A C -0.2130(3) -0.1082(3) 0.92953(18) 0.0549(10) Uani 1 1 d . . . 
H5A1 H -0.1679 -0.1021 0.8853 0.066 Uiso 1 1 calc R . . 
H5A2 H -0.2558 -0.1701 0.9297 0.066 Uiso 1 1 calc R . . 
C6A C -0.3102(3) -0.0296(3) 0.9349(2) 0.0627(11) Uani 1 1 d . . . 
H6A1 H -0.3680 -0.0340 0.8953 0.075 Uiso 1 1 calc R . . 
H6A2 H -0.3595 -0.0386 0.9775 0.075 Uiso 1 1 calc R . . 
C7A C -0.2512(3) 0.0687(3) 0.93597(18) 0.0546(10) Uani 1 1 d . . . 
H7A H -0.2093 0.0793 0.8907 0.065 Uiso 1 1 calc R . . 
C8A C -0.1513(3) 0.0739(3) 0.99271(17) 0.0523(9) Uani 1 1 d . . . 
H8A1 H -0.1062 0.1345 0.9880 0.063 Uiso 1 1 calc R . . 
H8A2 H -0.1938 0.0745 1.0379 0.063 Uiso 1 1 calc R . . 
C9A C -0.0304(4) -0.1928(3) 0.99261(19) 0.0560(10) Uani 1 1 d . . . 
H9A H 0.0342 -0.1794 1.0284 0.067 Uiso 1 1 calc R . . 
C10A C -0.1032(5) -0.2814(3) 1.0164(2) 0.0809(14) Uani 1 1 d . . . 
H10A H -0.1498 -0.2667 1.0584 0.121 Uiso 1 1 calc R . . 
H10B H -0.0445 -0.3329 1.0257 0.121 Uiso 1 1 calc R . . 
H10C H -0.1613 -0.3008 0.9802 0.121 Uiso 1 1 calc R . . 
C11A C 0.0391(4) -0.2175(3) 0.9250(2) 0.0613(11) Uani 1 1 d . . . 
H11A H -0.0216 -0.2289 0.8883 0.092 Uiso 1 1 calc R . . 
H11B H 0.0895 -0.2744 0.9321 0.092 Uiso 1 1 calc R . . 
H11C H 0.0935 -0.1649 0.9120 0.092 Uiso 1 1 calc R . . 
C12A C -0.3490(4) 0.1478(4) 0.9461(2) 0.0762(13) Uani 1 1 d . . . 
H12A H -0.4109 0.1447 0.9091 0.114 Uiso 1 1 calc R . . 
H12B H -0.3075 0.2094 0.9451 0.114 Uiso 1 1 calc R . . 
H12C H -0.3906 0.1394 0.9906 0.114 Uiso 1 1 calc R . . 
N1B N 0.1730(2) 0.0083(2) 0.85231(13) 0.0440(7) Uani 1 1 d . . . 
C1B C 0.2423(3) 0.0014(3) 0.91212(17) 0.0515(9) Uani 1 1 d . . . 
O1B O 0.36761(19) -0.0004(2) 0.90163(14) 0.0621(7) Uani 1 1 d . . . 
C2B C 0.3805(3) -0.0205(3) 0.8273(2) 0.0605(11) Uani 1 1 d . . . 
H2B1 H 0.3937 -0.0889 0.8200 0.073 Uiso 1 1 calc R . . 
H2B2 H 0.4532 0.0139 0.8084 0.073 Uiso 1 1 calc R . . 
C3B C 0.2581(3) 0.0123(2) 0.79013(18) 0.0473(8) Uani 1 1 d . . . 
C4B C 0.2674(3) 0.1125(3) 0.7589(2) 0.0516(9) Uani 1 1 d . . . 
H4B H 0.3318 0.1074 0.7219 0.062 Uiso 1 1 calc R . . 
C5B C 0.1459(3) 0.1374(3) 0.7212(2) 0.0551(9) Uani 1 1 d . . . 
H5B1 H 0.1539 0.2009 0.7004 0.066 Uiso 1 1 calc R . . 
H5B2 H 0.0766 0.1394 0.7548 0.066 Uiso 1 1 calc R . . 
C6B C 0.1151(4) 0.0650(3) 0.6642(2) 0.0603(10) Uani 1 1 d . . . 
H6B1 H 0.0348 0.0821 0.6424 0.072 Uiso 1 1 calc R . . 
H6B2 H 0.1805 0.0674 0.6283 0.072 Uiso 1 1 calc R . . 
C7B C 0.1065(3) -0.0352(3) 0.69280(18) 0.0562(10) Uani 1 1 d . . . 
H7B H 0.0327 -0.0378 0.7242 0.067 Uiso 1 1 calc R . . 
C8B C 0.2212(3) -0.0604(3) 0.73509(19) 0.0553(9) Uani 1 1 d . . . 
H8B1 H 0.2925 -0.0688 0.7033 0.066 Uiso 1 1 calc R . . 
H8B2 H 0.2062 -0.1217 0.7580 0.066 Uiso 1 1 calc R . . 
C9B C 0.3149(4) 0.1928(3) 0.8074(3) 0.0740(13) Uani 1 1 d . . . 
H9B H 0.3801 0.1650 0.8381 0.089 Uiso 1 1 calc R . . 
C10B C 0.3776(5) 0.2715(4) 0.7645(3) 0.108(2) Uani 1 1 d . . . 
H10D H 0.3139 0.3057 0.7383 0.162 Uiso 1 1 calc R . . 
H10E H 0.4378 0.2434 0.7327 0.162 Uiso 1 1 calc R . . 
H10F H 0.4207 0.3154 0.7954 0.162 Uiso 1 1 calc R . . 
C11B C 0.2145(5) 0.2369(4) 0.8537(3) 0.0953(16) Uani 1 1 d . . . 
H11D H 0.1528 0.2694 0.8251 0.143 Uiso 1 1 calc R . . 
H11E H 0.2534 0.2823 0.8851 0.143 Uiso 1 1 calc R . . 
H11F H 0.1734 0.1872 0.8804 0.143 Uiso 1 1 calc R . . 
C12B C 0.0845(5) -0.1081(4) 0.6339(2) 0.0842(14) Uani 1 1 d . . . 
H12D H 0.1550 -0.1063 0.6018 0.126 Uiso 1 1 calc R . . 
H12E H 0.0077 -0.0921 0.6093 0.126 Uiso 1 1 calc R . . 
H12F H 0.0772 -0.1715 0.6535 0.126 Uiso 1 1 calc R . . 
S1 S 0.27222(8) 0.53716(7) 0.78945(4) 0.0505(2) Uani 1 1 d . . . 
O1 O 0.4037(2) 0.5198(2) 0.78492(17) 0.0786(8) Uani 1 1 d . . . 
O2 O 0.1965(2) 0.4996(2) 0.73439(11) 0.0604(7) Uani 1 1 d . . . 
O3 O 0.2208(3) 0.5267(2) 0.85752(12) 0.0714(8) Uani 1 1 d . . . 
C100 C 0.2624(4) 0.6653(3) 0.77517(19) 0.0605(10) Uani 1 1 d . . . 
F1 F 0.1455(2) 0.69584(19) 0.77569(18) 0.1039(10) Uani 1 1 d . . . 
F2 F 0.3236(3) 0.7143(2) 0.82264(13) 0.0948(9) Uani 1 1 d . . . 
F3 F 0.3140(3) 0.68969(18) 0.71470(11) 0.0828(8) Uani 1 1 d . . . 
 
loop_ 
 _atom_site_aniso_label 
 _atom_site_aniso_U_11 
 _atom_site_aniso_U_22 
 _atom_site_aniso_U_33 
 _atom_site_aniso_U_23 
 _atom_site_aniso_U_13 
 _atom_site_aniso_U_12 
C1 0.0301(15) 0.062(2) 0.0358(15) 0.0017(16) -0.0005(13) -0.0009(17) 
N1A 0.0330(13) 0.0612(19) 0.0350(13) -0.0002(13) -0.0044(11) -0.0034(14) 
C1A 0.0405(18) 0.073(3) 0.0443(18) 0.0015(18) -0.0140(15) -0.0034(19) 
O1A 0.0527(14) 0.098(2) 0.0421(12) 0.0060(14) -0.0181(11) -0.0053(15) 
C2A 0.058(2) 0.081(3) 0.0399(18) -0.005(2) -0.0081(17) 0.001(2) 
C3A 0.0394(16) 0.064(2) 0.0323(15) -0.0025(16) 0.0004(13) 0.0015(18) 
C4A 0.0466(19) 0.061(2) 0.0370(17) -0.0008(17) 0.0050(16) -0.0025(18) 
C5A 0.0421(18) 0.076(3) 0.0463(19) -0.0033(18) -0.0039(16) -0.013(2) 
C6A 0.0380(18) 0.094(3) 0.056(2) 0.002(2) 0.0003(16) -0.002(2) 
C7A 0.043(2) 0.080(3) 0.0403(17) 0.0061(17) 0.0054(16) 0.008(2) 
C8A 0.053(2) 0.065(2) 0.0388(18) -0.0010(17) 0.0067(16) 0.0081(19) 
C9A 0.058(2) 0.066(3) 0.044(2) 0.0002(18) -0.0019(18) 0.005(2) 
C10A 0.096(3) 0.071(3) 0.076(3) 0.010(2) 0.027(3) 0.005(3) 
C11A 0.052(2) 0.070(3) 0.062(2) -0.008(2) 0.0132(19) 0.000(2) 
C12A 0.062(3) 0.103(4) 0.063(3) 0.010(2) 0.014(2) 0.031(3) 
N1B 0.0286(12) 0.0567(19) 0.0467(15) 0.0060(13) 0.0009(11) -0.0024(13) 
C1B 0.0300(16) 0.069(2) 0.0558(19) 0.0081(19) -0.0117(15) -0.0032(17) 
O1B 0.0286(11) 0.082(2) 0.0759(17) 0.0160(16) -0.0077(11) -0.0019(13) 
C2B 0.0375(18) 0.064(3) 0.080(3) 0.016(2) 0.0056(18) 0.0075(19) 
C3B 0.0325(16) 0.051(2) 0.0581(18) 0.0086(17) 0.0078(16) 0.0033(15) 
C4B 0.0366(17) 0.049(2) 0.070(2) 0.0098(17) 0.0072(17) 0.0018(17) 
C5B 0.047(2) 0.057(2) 0.061(2) 0.0105(19) 0.0027(18) 0.0095(17) 
C6B 0.058(2) 0.075(3) 0.049(2) 0.0108(19) 0.0083(18) 0.007(2) 
C7B 0.052(2) 0.069(3) 0.048(2) -0.0047(19) 0.0144(17) -0.0007(19) 
C8B 0.053(2) 0.055(2) 0.058(2) 0.0048(17) 0.0149(19) 0.0033(18) 
C9B 0.052(2) 0.054(3) 0.116(4) 0.010(2) -0.019(2) -0.0021(19) 
C10B 0.077(3) 0.060(3) 0.188(6) 0.026(4) -0.011(4) -0.014(3) 
C11B 0.100(4) 0.071(3) 0.114(4) -0.030(3) -0.001(4) -0.009(3) 
C12B 0.084(3) 0.103(4) 0.066(3) -0.016(3) 0.014(2) -0.016(3) 
S1 0.0477(4) 0.0626(5) 0.0411(4) -0.0014(4) -0.0039(4) -0.0036(4) 
O1 0.0471(13) 0.088(2) 0.101(2) 0.001(2) -0.0045(15) 0.0092(14) 
O2 0.0669(15) 0.0706(17) 0.0435(12) -0.0040(12) -0.0102(11) -0.0164(15) 
O3 0.0870(18) 0.091(2) 0.0366(12) 0.0065(13) 0.0025(13) -0.0141(18) 
C100 0.055(2) 0.075(3) 0.051(2) -0.0009(19) 0.0033(19) -0.015(2) 
F1 0.0660(16) 0.0751(18) 0.171(3) 0.0131(19) 0.0122(19) 0.0067(13) 
F2 0.130(2) 0.0817(19) 0.0730(16) -0.0226(14) -0.0066(17) -0.0337(18) 
F3 0.113(2) 0.0806(17) 0.0546(13) 0.0052(12) 0.0133(15) -0.0267(14) 
 
_geom_special_details 
; 
 All esds (except the esd in the dihedral angle between two l.s. planes) 
 are estimated using the full covariance matrix.  The cell esds are taken 
 into account individually in the estimation of esds in distances, angles 
 and torsion angles; correlations between esds in cell parameters are only 
 used when they are defined by crystal symmetry.  An approximate (isotropic) 
 treatment of cell esds is used for estimating esds involving l.s. planes. 
; 
 
loop_ 
 _geom_bond_atom_site_label_1 
 _geom_bond_atom_site_label_2 
 _geom_bond_distance 
 _geom_bond_site_symmetry_2 
 _geom_bond_publ_flag 
C1 N1B 1.341(4) . ? 
C1 N1A 1.346(4) . ? 
N1A C1A 1.376(4) . ? 
N1A C3A 1.493(4) . ? 
C1A C1B 1.343(5) . ? 
C1A O1A 1.345(4) . ? 
O1A C2A 1.461(4) . ? 
C2A C3A 1.559(4) . ? 
C3A C8A 1.517(5) . ? 
C3A C4A 1.539(5) . ? 
C4A C5A 1.528(5) . ? 
C4A C9A 1.545(5) . ? 
C5A C6A 1.514(6) . ? 
C6A C7A 1.515(6) . ? 
C7A C8A 1.524(5) . ? 
C7A C12A 1.532(5) . ? 
C9A C10A 1.533(6) . ? 
C9A C11A 1.535(5) . ? 
N1B C1B 1.369(4) . ? 
N1B C3B 1.500(4) . ? 
C1B O1B 1.347(4) . ? 
O1B C2B 1.463(4) . ? 
C2B C3B 1.554(5) . ? 
C3B C8B 1.520(5) . ? 
C3B C4B 1.531(5) . ? 
C4B C5B 1.520(5) . ? 
C4B C9B 1.548(6) . ? 
C5B C6B 1.529(5) . ? 
C6B C7B 1.512(5) . ? 
C7B C8B 1.507(5) . ? 
C7B C12B 1.543(6) . ? 
C9B C11B 1.520(6) . ? 
C9B C10B 1.530(6) . ? 
S1 O1 1.421(2) . ? 
S1 O3 1.426(2) . ? 
S1 O2 1.430(2) . ? 
S1 C100 1.821(4) . ? 
C100 F1 1.313(4) . ? 
C100 F2 1.315(4) . ? 
C100 F3 1.331(4) . ? 
 
loop_ 
 _geom_angle_atom_site_label_1 
 _geom_angle_atom_site_label_2 
 _geom_angle_atom_site_label_3 
 _geom_angle 
 _geom_angle_site_symmetry_1 
 _geom_angle_site_symmetry_3 
 _geom_angle_publ_flag 
N1B C1 N1A 106.4(3) . . ? 
C1 N1A C1A 109.5(3) . . ? 
C1 N1A C3A 139.5(2) . . ? 
C1A N1A C3A 110.4(2) . . ? 
C1B C1A O1A 139.0(3) . . ? 
C1B C1A N1A 107.1(3) . . ? 
O1A C1A N1A 113.7(3) . . ? 
C1A O1A C2A 105.4(2) . . ? 
O1A C2A C3A 108.0(3) . . ? 
N1A C3A C8A 112.1(3) . . ? 
N1A C3A C4A 112.1(3) . . ? 
C8A C3A C4A 112.1(3) . . ? 
N1A C3A C2A 98.1(2) . . ? 
C8A C3A C2A 108.9(3) . . ? 
C4A C3A C2A 112.7(3) . . ? 
C5A C4A C3A 110.1(3) . . ? 
C5A C4A C9A 114.0(3) . . ? 
C3A C4A C9A 116.9(3) . . ? 
C6A C5A C4A 112.1(3) . . ? 
C7A C6A C5A 112.4(3) . . ? 
C6A C7A C8A 109.9(3) . . ? 
C6A C7A C12A 112.3(3) . . ? 
C8A C7A C12A 110.3(3) . . ? 
C3A C8A C7A 115.6(3) . . ? 
C10A C9A C11A 108.2(3) . . ? 
C10A C9A C4A 110.7(3) . . ? 
C11A C9A C4A 115.8(3) . . ? 
C1 N1B C1B 109.9(3) . . ? 
C1 N1B C3B 139.7(3) . . ? 
C1B N1B C3B 110.4(2) . . ? 
C1A C1B O1B 138.8(3) . . ? 
C1A C1B N1B 107.2(3) . . ? 
O1B C1B N1B 114.0(3) . . ? 
C1B O1B C2B 104.1(3) . . ? 
O1B C2B C3B 108.3(3) . . ? 
N1B C3B C8B 112.0(3) . . ? 
N1B C3B C4B 112.7(3) . . ? 
C8B C3B C4B 111.0(3) . . ? 
N1B C3B C2B 97.3(2) . . ? 
C8B C3B C2B 109.8(3) . . ? 
C4B C3B C2B 113.5(3) . . ? 
C5B C4B C3B 110.1(3) . . ? 
C5B C4B C9B 113.4(3) . . ? 
C3B C4B C9B 116.9(3) . . ? 
C4B C5B C6B 111.8(3) . . ? 
C7B C6B C5B 111.7(3) . . ? 
C8B C7B C6B 111.4(3) . . ? 
C8B C7B C12B 111.3(4) . . ? 
C6B C7B C12B 110.9(3) . . ? 
C7B C8B C3B 115.3(3) . . ? 
C11B C9B C10B 109.1(4) . . ? 
C11B C9B C4B 114.9(3) . . ? 
C10B C9B C4B 110.0(4) . . ? 
O1 S1 O3 114.56(19) . . ? 
O1 S1 O2 116.39(18) . . ? 
O3 S1 O2 115.25(16) . . ? 
O1 S1 C100 102.50(18) . . ? 
O3 S1 C100 102.57(18) . . ? 
O2 S1 C100 102.65(17) . . ? 
F1 C100 F2 107.0(4) . . ? 
F1 C100 F3 108.2(4) . . ? 
F2 C100 F3 105.6(3) . . ? 
F1 C100 S1 112.0(3) . . ? 
F2 C100 S1 112.5(3) . . ? 
F3 C100 S1 111.2(3) . . ? 
 
loop_ 
 _geom_torsion_atom_site_label_1 
 _geom_torsion_atom_site_label_2 
 _geom_torsion_atom_site_label_3 
 _geom_torsion_atom_site_label_4 
 _geom_torsion 
 _geom_torsion_site_symmetry_1 
 _geom_torsion_site_symmetry_2 
 _geom_torsion_site_symmetry_3 
 _geom_torsion_site_symmetry_4 
 _geom_torsion_publ_flag 
N1B C1 N1A C1A -0.9(4) . . . . ? 
N1B C1 N1A C3A -170.3(4) . . . . ? 
C1 N1A C1A C1B 0.8(5) . . . . ? 
C3A N1A C1A C1B 173.5(3) . . . . ? 
C1 N1A C1A O1A -175.2(3) . . . . ? 
C3A N1A C1A O1A -2.5(5) . . . . ? 
C1B C1A O1A C2A 174.6(5) . . . . ? 
N1A C1A O1A C2A -11.2(5) . . . . ? 
C1A O1A C2A C3A 20.0(4) . . . . ? 
C1 N1A C3A C8A -62.6(6) . . . . ? 
C1A N1A C3A C8A 128.1(3) . . . . ? 
C1 N1A C3A C4A 64.5(5) . . . . ? 
C1A N1A C3A C4A -104.9(3) . . . . ? 
C1 N1A C3A C2A -176.9(4) . . . . ? 
C1A N1A C3A C2A 13.8(4) . . . . ? 
O1A C2A C3A N1A -20.1(4) . . . . ? 
O1A C2A C3A C8A -136.9(3) . . . . ? 
O1A C2A C3A C4A 98.1(4) . . . . ? 
N1A C3A C4A C5A -76.3(3) . . . . ? 
C8A C3A C4A C5A 50.8(4) . . . . ? 
C2A C3A C4A C5A 174.1(3) . . . . ? 
N1A C3A C4A C9A 55.8(4) . . . . ? 
C8A C3A C4A C9A -177.1(3) . . . . ? 
C2A C3A C4A C9A -53.8(4) . . . . ? 
C3A C4A C5A C6A -55.6(4) . . . . ? 
C9A C4A C5A C6A 170.8(3) . . . . ? 
C4A C5A C6A C7A 58.1(4) . . . . ? 
C5A C6A C7A C8A -53.1(4) . . . . ? 
C5A C6A C7A C12A -176.3(3) . . . . ? 
N1A C3A C8A C7A 77.2(4) . . . . ? 
C4A C3A C8A C7A -49.9(4) . . . . ? 
C2A C3A C8A C7A -175.3(3) . . . . ? 
C6A C7A C8A C3A 50.0(4) . . . . ? 
C12A C7A C8A C3A 174.4(3) . . . . ? 
C5A C4A C9A C10A -71.3(4) . . . . ? 
C3A C4A C9A C10A 158.4(3) . . . . ? 
C5A C4A C9A C11A 52.3(4) . . . . ? 
C3A C4A C9A C11A -78.1(4) . . . . ? 
N1A C1 N1B C1B 0.6(4) . . . . ? 
N1A C1 N1B C3B -178.2(4) . . . . ? 
O1A C1A C1B O1B -7.1(10) . . . . ? 
N1A C1A C1B O1B 178.5(5) . . . . ? 
O1A C1A C1B N1B 174.0(5) . . . . ? 
N1A C1A C1B N1B -0.4(5) . . . . ? 
C1 N1B C1B C1A -0.1(5) . . . . ? 
C3B N1B C1B C1A 179.1(3) . . . . ? 
C1 N1B C1B O1B -179.3(3) . . . . ? 
C3B N1B C1B O1B -0.1(5) . . . . ? 
C1A C1B O1B C2B 166.0(6) . . . . ? 
N1B C1B O1B C2B -15.1(4) . . . . ? 
C1B O1B C2B C3B 24.1(4) . . . . ? 
C1 N1B C3B C8B -52.3(6) . . . . ? 
C1B N1B C3B C8B 128.9(3) . . . . ? 
C1 N1B C3B C4B 73.7(5) . . . . ? 
C1B N1B C3B C4B -105.1(3) . . . . ? 
C1 N1B C3B C2B -167.1(4) . . . . ? 
C1B N1B C3B C2B 14.1(4) . . . . ? 
O1B C2B C3B N1B -22.8(4) . . . . ? 
O1B C2B C3B C8B -139.4(3) . . . . ? 
O1B C2B C3B C4B 95.8(3) . . . . ? 
N1B C3B C4B C5B -72.9(4) . . . . ? 
C8B C3B C4B C5B 53.6(4) . . . . ? 
C2B C3B C4B C5B 177.8(3) . . . . ? 
N1B C3B C4B C9B 58.4(4) . . . . ? 
C8B C3B C4B C9B -175.1(3) . . . . ? 
C2B C3B C4B C9B -50.9(4) . . . . ? 
C3B C4B C5B C6B -57.5(4) . . . . ? 
C9B C4B C5B C6B 169.5(3) . . . . ? 
C4B C5B C6B C7B 56.8(4) . . . . ? 
C5B C6B C7B C8B -51.4(4) . . . . ? 
C5B C6B C7B C12B -176.0(3) . . . . ? 
C6B C7B C8B C3B 50.0(4) . . . . ? 
C12B C7B C8B C3B 174.4(3) . . . . ? 
N1B C3B C8B C7B 75.6(4) . . . . ? 
C4B C3B C8B C7B -51.3(4) . . . . ? 
C2B C3B C8B C7B -177.6(3) . . . . ? 
C5B C4B C9B C11B 46.2(5) . . . . ? 
C3B C4B C9B C11B -83.5(4) . . . . ? 
C5B C4B C9B C10B -77.3(4) . . . . ? 
C3B C4B C9B C10B 153.0(3) . . . . ? 
O1 S1 C100 F1 178.4(3) . . . . ? 
O3 S1 C100 F1 -62.5(3) . . . . ? 
O2 S1 C100 F1 57.3(3) . . . . ? 
O1 S1 C100 F2 -61.0(3) . . . . ? 
O3 S1 C100 F2 58.0(3) . . . . ? 
O2 S1 C100 F2 177.9(3) . . . . ? 
O1 S1 C100 F3 57.2(3) . . . . ? 
O3 S1 C100 F3 176.2(3) . . . . ? 
O2 S1 C100 F3 -63.9(3) . . . . ? 
 
_diffrn_measured_fraction_theta_max    0.967 
_diffrn_reflns_theta_full              67.82 
_diffrn_measured_fraction_theta_full   0.967 
_refine_diff_density_max    0.189 
_refine_diff_density_min   -0.257 
_refine_diff_density_rms    0.045 
